# Supplementary material for: Virtual Rejection and Overinclusion in Eating Disorders: An Experimental Investigation of the Impact on Emotions, Stress Perception, and Food Attitudes
Source: MDPI journal article supplement (doi:10.3390/nu15041021), 2023-02-17
Supplement: s1 [file s1]

# Virtual Rejection and Overinclusion in Eating Disorders: An Experimental Investigation of the Impact on Emotions, Stress Perception, and Food Attitudes

Paolo Meneguzzo <sup>1,2,\*</sup>, Valentina Meregalli <sup>1,2</sup>, Enrico Collantoni <sup>1,2</sup>, Valentina Cardi <sup>3,4</sup>, Elena Tenconi <sup>1,2</sup> and Angela Favaro <sup>1,2</sup>

<sup>1</sup> Department of Neuroscience, University of Padova, Via Giustiniani 2, 35128 Padova, Italy  
<sup>2</sup> Neuroscience Padova Center, University of Padova, Via Orus 2, 35128 Padova, Italy  
<sup>3</sup> Department of Psychological Medicine, Institute of Psychiatry, Psychology and Neuroscience, King's College London, London WC2R 2LS, UK  
<sup>4</sup> Department of General Psychology, University of Padova, Via Venezia 8, 35128 Padova, Italy  
\* Correspondence: paolo.meneguzzo@unipd.it; Tel: +39-0498213830

## Supplementary Materials

**Table S1.** Comparisons between participants in the excluded and overincluded conditions at baseline.

|                          | Excluded Condition | Included Condition | <i>t</i><br><i>p</i> |
|--------------------------|--------------------|--------------------|----------------------|
| Age, years               | 25.65 (7.58)       | 25.48 (7.77)       | 0.149<br>0.882       |
| BMI, kg/m <sup>2</sup>   | 21.57 (4.76)       | 23.85 (9.62)       | -1.968<br>0.061      |
| Menarche, years          | 12.10 (1.37)       | 12.35 (1.39)       | -1.202<br>0.231      |
| Education, years         | 15.52 (2.76)       | 14.65 (3.10)       | 1.955<br>0.062       |
| Illness duration, months | 5.61 (7.62)        | 5.77 (7.67)        | -0.128<br>0.899      |
| PHQ-9                    | 9.94 (5.34)        | 9.38 (4.90)        | 0.700<br>0.558       |
| EDE-Q Global             | 15.56 (8.53)       | 14.08 (9.45)       | 1.073<br>0.285       |
| PANAS pos pre            | 26.94 (5.98)       | 28.08 (5.95)       | -1.228<br>0.221      |
| PANAS neg pre            | 14.52 (5.64)       | 14.40 (6.85)       | 0.134<br>0.894       |
| SRS pre                  | 2.73 (1.45)        | 3.02 (1.88)        | -1.133<br>0.259      |
| TBS pre                  | 1.49 (0.72)        | 1.95 (1.52)        | -2.155<br>0.130      |
| TRS pre                  | 3.23 (2.08)        | 3.00 (2.30)        | 0.696<br>0.487       |

Means and standard deviations are reported.

**Table S2.** Correlation analyses exclusion condition.

|             | <b>DPANAS-pos</b> | <b>DPANAS-neg</b> | <b>DTBS</b> | <b>DTRS</b> | <b>DSRS</b> |
|-------------|-------------------|-------------------|-------------|-------------|-------------|
| <b>AN</b>   |                   |                   |             |             |             |
| Belonging   | 0.256             | -0.124            | -           | -0.148      | -0.321      |
| Self-esteem | 0.428             | -0.395            | -           | -0.021      | -0.078      |
| ME          | 0.562             | -0.349            | -           | -0.282      | -0.361      |
| Control     | 0.177             | 0.274             | -           | -0.149      | -0.366      |
| <b>BN</b>   |                   |                   |             |             |             |
| Belonging   | 0.074             | 0.227             | -0.101      | 0.061       | -0.699*     |
| Self-esteem | 0.346             | 0.346             | 0.196       | -0.044      | -0.375      |
| ME          | -0.755*           | -0.623*           | 0.040       | -0.160      | -0.696*     |
| Control     | -0.687*           | 0.177             | -0.006      | -0.012      | -0.420      |
| <b>BED</b>  |                   |                   |             |             |             |
| Belonging   | -0.385            | -0.431            | -0.385      | -0.728*     | -0.597*     |
| Self-esteem | -0.543            | -0.763*           | -0.543      | 0.139       | -0.395      |
| ME          | -0.606*           | -0.277            | -0.314      | -0.214      | -0.214      |
| Control     | 0.347             | -0.865*           | -0.273      | 0.337       | 0.393       |
| <b>HW</b>   |                   |                   |             |             |             |
| Belonging   | 0.066             | -0.143            | -0.149      | 0.330       | 0.015       |
| Self-esteem | -0.042            | -0.468            | -0.313      | 0.229       | 0.165       |
| ME          | 0.154             | -0.353            | -0.575      | 0.379       | 0.046       |
| Control     | -0.065            | 0.164             | -0.237      | 0.184       | 0.141       |

AN: anorexia nervosa; BN: bulimia nervosa; BED: binge eating disorder; HW: healthy women; ME: meaningful existence; PANAS: positive and negative affect schedule; D: difference; pos: positive; neg: negative; SRS: stress related scale; TBS: thoughts about binge scale; TRS: thoughts about restraint scale. \*:  $p < 0.01$ , only correlation with  $p < 0.01$  should be considered due to the Bonferroni correction. Differences were evaluated as post-pre task for all the variables. NTS subscales (belonging, self-esteem, ME and Control) were collected after the task, while other variables were collected both pre and post.

**Table S3.** Correlation analyses overinclusion condition.

|             | <b>DPANAS-pos</b> | <b>DPANAS-neg</b> | <b>DTBS</b> | <b>DTRS</b> | <b>DSRS</b> |
|-------------|-------------------|-------------------|-------------|-------------|-------------|
| <b>AN</b>   |                   |                   |             |             |             |
| Belonging   | 0.239             | -0.101            | -0.227      | 0.003       | -0.228      |
| Self-esteem | 0.391             | -0.250            | -0.078      | 0.163       | -0.364      |
| ME          | 0.127             | 0.167             | 0.231       | 0.518       | -0.053      |
| Control     | 0.307             | 0.265             | 0.067       | 0.057       | 0.391       |
| <b>BN</b>   |                   |                   |             |             |             |
| Belonging   | 0.107             | -0.384            | -0.690*     | -0.298      | -0.526      |
| Self-esteem | 0.486             | 0.563*            | -0.299      | -0.610*     | -0.170      |
| ME          | 0.412             | -0.430            | -0.462      | -0.239      | -0.606*     |
| Control     | 0.572*            | -0.489            | -0.564*     | -0.121      | -0.239      |
| <b>BED</b>  |                   |                   |             |             |             |
| Belonging   | -0.841*           | -0.137            | 0.236       | 0.583       | 0.612*      |
| Self-esteem | -0.385            | -0.655*           | 0.305       | 0.738*      | 0.757*      |
| ME          | 0.121             | -0.439            | 0.571       | 0.511       | 0.734*      |
| Control     | 0.213             | 0.681*            | 0.604*      | 0.113       | 0.717*      |
| <b>HW</b>   |                   |                   |             |             |             |
| Belonging   | 0.010             | 0.110             | 0.053       | 0.029       | 0.029       |

|             |        |        |       |        |        |
|-------------|--------|--------|-------|--------|--------|
| Self-esteem | -0.008 | -0.132 | 0.002 | 0.024  | -0.008 |
| ME          | -0.076 | 0.075  | 0.124 | -0.020 | -0.076 |
| Control     | -0.244 | 0.114  | 0.080 | -0.059 | -0.244 |

AN: anorexia nervosa; BN: bulimia nervosa; BED: binge eating disorder; HC: healthy women; ME: meaningful existence; PANAS: positive and negative affect schedule; D: difference; pos: positive; neg: negative; SRS: stress related scale; TBS: thoughts about binge scale; TRS: thoughts about restraint scale. \*:  $p < 0.01$ , only correlation with  $p < 0.01$  should be considered due to the Bonferroni correction. Differences were evaluated as pre minus post task for all the variables. NTS subscales (belonging, self-esteem, ME and Control) were collected after the task, while other variables were collected both pre and post.

**Table S4.** Evaluation of change due to the Cyberball task.

|                | Exclusion Condition |          | Overinclusion Condition |          |
|----------------|---------------------|----------|-------------------------|----------|
|                | <i>t</i>            | <i>p</i> | <i>t</i>                | <i>p</i> |
| AN             |                     |          |                         |          |
| PANAS positive | 1.047               | 0.307    | 2.629                   | 0.015    |
| PANAS negative | 0.381               | 0.707    | -1.453                  | 0.163    |
| SRS            | 0.548               | 0.589    | -0.809                  | 0.428    |
| TBS            | 1.000               | 0.333    | 0.825                   | 0.419    |
| TRS            | 1.000               | 0.329    | 1.926                   | 0.069    |
| BN             |                     |          |                         |          |
| PANAS positive | 1.332               | 0.203    | 1.370                   | 0.187    |
| PANAS negative | -1.624              | 0.125    | 4.656                   | < 0.001  |
| SRS            | -1.094              | 0.255    | 3.782                   | 0.001    |
| TBS            | -2.041              | 0.033    | 1.746                   | 0.096    |
| TRS            | -1.000              | 0.331    | -0.698                  | 0.493    |
| BED            |                     |          |                         |          |
| PANAS positive | 2.304               | 0.033    | 0.986                   | 0.336    |
| PANAS negative | 2.977               | 0.008    | 2.342                   | 0.030    |
| SRS            | -0.370              | 0.716    | 1.073                   | 0.297    |
| TBS            | -1.453              | 0.163    | 4.819                   | <0.001   |
| TRS            | 2.651               | 0.012    | -0.339                  | 0.739    |
| HW             |                     |          |                         |          |
| PANAS positive | 7.582               | <0.001   | -3.565                  | 0.002    |
| PANAS negative | -5.630              | <0.001   | 1.209                   | 0.239    |
| SRS            | 0.775               | 0.446    | 1.445                   | 0.161    |
| TBS            | -1.000              | 0.327    | 1.000                   | 0.327    |
| TRS            | 2.619               | 0.012    | 1.674                   | 0.107    |

*t*-test for paired sample. Means and standard deviations are reported in the main text.
